# Supplementary material
Source: Springer Nature journal article supplement (https://www.springermedizin.de/resource/supplementary/12876_2011_599_MOESM5_ESM.pdf/9437332)

**A**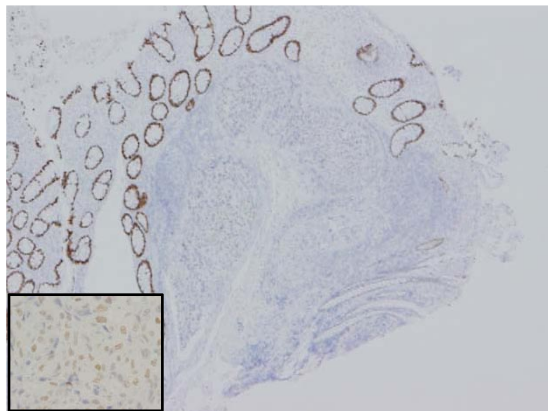**B**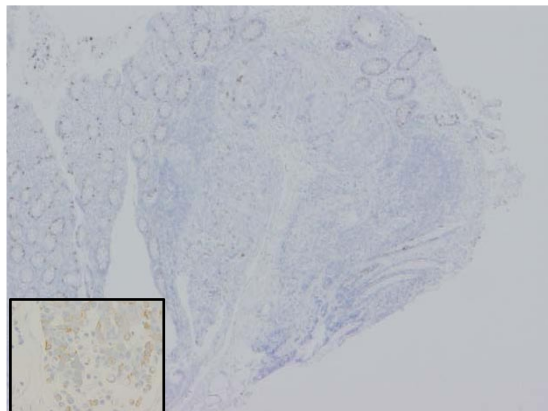**C**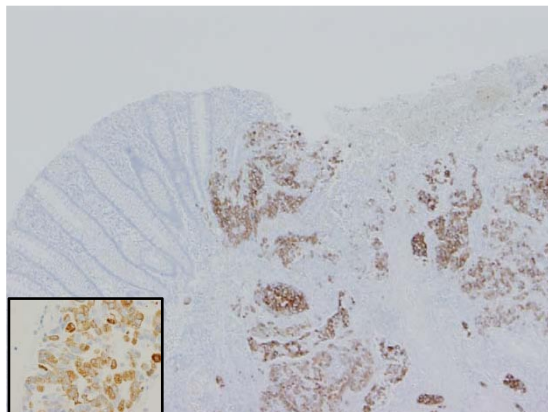**D**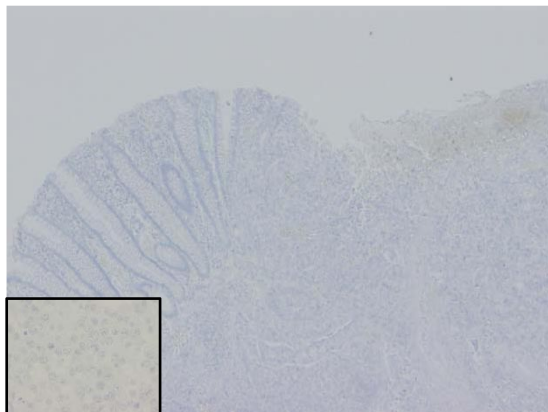

Supplement: MOESM5 [file 9437332]
